# Supplementary material for: Greenhouse gas flux studies: An automated online system for gas emission measurements in aquatic environments
Source: Copernicus journal article supplement (doi:10.5194/hess-2019-83), 2019-04-04
Supplement: Supplementary file 1 [file BOM_Xbeedatalogger.xlsx]

## Sheet: Top SMD
Designator	Description	Manufacturer	MFG Part Number	Quantity	Distributor	Distributor P/N	Value	Rating	Package
IC1	IC MCU 16BIT 128KB FLASH 100TQFP	Microchip Technology	PIC24FJ128GA010-I/PF	1	digikey	PIC24FJ128GA010-I/PF-ND			100-TQFP
IC2	RS-232 Interface IC 3-5.5V 250kbps Transceiver	Maxim Integrated	MAX3222ECUP+	1	mouser	700-MAX3222ECUP			20-TSSOP (0.173", 4.40mm Width)
U$7	DIP Switches/SIP Switches HALF PITCH 8 POS	C&K Components	TDA08H0SB1		mouser	611-TDA08H0SB1		25 mA at 24 V, 100 mA at 50 V	DIP-8
U$4	Memory Card Connectors WR-CRD SD Card Dtctn 9Pin Push & Pull	Wurth Electronics	693063010911	1	mouser	710-693063010911		WR-CRD	SMT
C2, C3, C6, C7, C17, C18	CAP CER 0.1UF 50V 20% X5R 0805	TDK Corporation	C2012X5R1H104M085AA	6	digikey	445-10548-1-ND	0.1µF	50V	0805 (2012 Metric)
R10, R15	RES 10K OHM 1/8W 1% 0805	Stackpole Electronics Inc	RMCF0805FT10K0	2	digikey	RMCF0805FT10K0CT-ND	10k	0.125W, 1/8W	0805 (2012 Metric)

## Sheet: Bottom solder
Designator	Description	Manufacturer	MFG Part Number	Quantity	Distributor	Distributor P/N	Value	Rating	Package
C1	CAP CER 10UF 6.3V 10% X5R 0805	Yageo	CC0805KKX5R5BB106	1	digikey	311-1459-1-ND	10µF	6.3V	0805 (2012 Metric)
C8,C9,C10,C11,C12,C13,C14,C15,C16, C19,C20,C21,C22,C23,C24	CAP CER 0.1UF 50V 20% X5R 0805	TDK Corporation	C2012X5R1H104M085AA	17	digikey	445-10548-1-ND	0.1µF	50V	0805 (2012 Metric)
C4, C5	CAP CER 22PF 50V 5% NP0 0805	Kemet	C0805C220J5GACTU	2	digikey	399-1113-1-ND	22pF	50V	0805 (2012 Metric)
R3, R4, R16,R17,R18,R19,R20,R21	RES 5.6K OHM 1/8W 1% 0805	Stackpole Electronics Inc	RMCF0805FT5K60	8	digikey	RMCF0805FT5K60CT-ND	5.6k	0.125W, 1/8W	0805 (2012 Metric)
R9	RES 18K OHM 1/8W 1% 0805 SMD	Bourns Inc.	CR0805-FX-1802ELF	1	digikey	CR0805-FX-1802ELFCT-ND	18k	0.125W, 1/8W	0805 (2012 Metric)
R11,R12,R13,R14	RES 10K OHM 1/8W 1% 0805	Stackpole Electronics Inc	RMCF0805FT10K0	4	digikey	RMCF0805FT10K0CT-ND	10k	0.125W, 1/8W	0805 (2012 Metric)
R8, R23	RES 2K OHM 1/8W 1% 0805	TE Connectivity Passive Product	CRG0805F2K0	2	digikey	A126358CT-ND	2k	0.125W, 1/8W	0805 (2012 Metric)
R7, R22	RES 0 OHM 1/8W 1% 0805	Yageo	RC0805JR-070RL	2	digikey	311-0.0ARCT-ND	0	0.125W, 1/8W	0805 (2012 Metric)
