# Supplementary material for: Greenhouse gas flux studies: An automated online system for gas emission measurements in aquatic environments
Source: Copernicus journal article supplement (doi:10.5194/hess-2019-83), 2019-04-04
Supplement: Supplementary file 2 [file BOM_PWCv8c_digikey.xlsx]

## Sheet: PWC_v3
Designator	Description	Manufacturer	MFG Part Number	Qty	Package	Distributor	Distributor P/N	Value	Rating	Tolerance
C1 - C14, C20, C21, C22	CAP ALUM 1000UF 25V 20% RADIAL	Nichicon	UVR1E102MPD1TD	16	E5-10,5	Digikey	493-5913-3-ND	1000µF	25V	±20%
C23, C27	CAP ALUM 0.1UF 50V 20% RADIAL	Nichicon	UMA1H0R1MDD	2	E1,8-4	Digikey	493-5955-ND	0.1µF	50V	±20%
C25	CAP ALUM 470UF 16V 20% RADIAL	Nichicon	UVY1C471MPD1TD	1	E3,5-8	Digikey	493-12899-1-ND	470µF	16V	±20%
C26	CAP ALUM 47UF 25V 20% RADIAL	Panasonic Electronic Components	ECA-1EHG470	1	E2-5	Digikey	P5539-ND	47µF	25V	±20%
C28	CAP ALUM 10UF 25V 20% RADIAL	Nichicon	UVR1E100MDD6TP	1	E1,8-4	Digikey	493-12772-1-ND	10µF	25V	±20%
CS1	CAP ALUM 0.47UF 50V 20% RADIAL	Nichicon	UPW1HR47MDD	1	E2-5	Digikey	493-1885-ND	0.47µF	50V	±20%
CS2	CAP ALUM 22UF 50V 20% RADIAL	Nichicon	UPB1H220MDD1TD	1	E2-5	Digikey	493-4938-1-ND	22µF	50V	±20%
1N5820	DIODE SCHOTTKY 20V 3A DO201AD	Vishay Semiconductor Diodes Division	1N5820-E3/54	1	C4111-15	Digikey	1N5820-E3/54GICT-ND
7810TV	IC REG LDO 10V 1A TO220-3	Texas Instruments	LM2940T-10.0/NOPB	1	TO220V	Digikey	LM2940T-10.0/NOPB-ND
LMC6484	IC OPAMP GP 1.5MHZ RRO 14DIP	Texas Instruments	LMC6484IN/NOPB	1	DIL14	Digikey	LMC6484IN/NOPB-ND
SFT1030	INDUCTOR 470UH FOR 50KHZ SWITCHR	Pulse Electronics Corporation	PE-53118NL	1	Radial	Digikey	553-1809-5-ND
R48 - R62, R64 - R70	RES 0 OHM 1/4W 5% 0805 SMD	Yageo	RC0805JR-7W0RL	22	0805 (2012 Metric)	Mouser	603-RC0805JR-7W0RL	0	0.25W, 1/4W	±5%
R24-R26, R29-R47, R63	RES 10K OHM 1/4W 1% 0805	Stackpole Electronics Inc	RNCP0805FTD10K0	22	0805 (2012 Metric)	Digikey	RNCP0805FTD10K0CT-ND	10k	0.25W, 1/4W	±1%
R71	RES 2K OHM 1/4W 1% 0805	Yageo	RC0805FR-072KL	1	0805 (2012 Metric)	Mouser	603-RC0805FR-072KL	2k	0.25W, 1/4W	±1%
R72	RES SMD 1K OHM 1% 1/4W 0805	Stackpole Electronics Inc.	RNCP0805FTD1K00	1	0805 (2012 Metric)	Digikey	RNCP0805FTD1K00CT-ND	1k	0.25W, 1/4W	±1%
R73	RES SMD 3K OHM 1% 1/8W 0805	Yageo	RC0805FR-073KL	1	0805 (2012 Metric)	Digikey	311-3.00KCRTR-ND	3k	0.25W, 1/4W	±1%
T1 - T14, T20, T21, T22	TRANSISTOR NPN 60V 4A TO-126	Fairchild Semiconductor	BD677AS	22	TO126V	Digikey	BD677ASFS-ND	NPN - Darlington
